# Supplementary material
Source: HighWire-hosted journal article supplement (http://erj.ersjournals.com/highwire/filestream/114121/field_highwire_adjunct_files/0/ERJ-00926-2013_Online_supplement.pdf)
Supplement: ERJ-00926-2013_Online_supplement.pdf [file ERJ-00926-2013_Online_supplement.pdf]

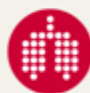

## ERS Research Seminar Dyspnoea: multidimensional and multidisciplinary

November 8-9, 2012 - Paris, France

SCIENTIFIC PROGRAMME

### Day 1 – Thursday, November 8, 2012

#### Introduction

08:00-08:15 *Arrival - registration of participants*

08:15-08:30 *Introduction*  
Pierantonio Laveneziana (Paris, France)  
Louis Laviolette (Paris, France)

#### 08:30-13:10 Session I – The neurophysiology of dyspnoea

08:30-09:25 *Respiratory command and neural processing of respiratory sensations*  
Paul W. Davenport (Florida, USA)  
*Discussant:* Thomas Similowski (Paris, France)

09:25-10:20 *Air hunger vs. excessive effort/work of breathing*  
Robert B. Banzett (Boston, USA)  
*Discussant:* Denis E. O'Donnell (Kinston, Canada)

10:20-10:40 *Coffee break*

10:40-11:35 *Affective and emotional dimensions of respiratory sensations*  
Andreas Von Leupoldt (Hamburg, Germany)  
*Discussant:* Mark B. Parshall (Albuquerque, USA)

11:35-12:30 *The language and psychometrics of dyspnoea in cardiorespiratory diseases*  
Mark B. Parshall (Albuquerque, USA)  
*Discussant:* Andreas Von Leupoldt (Hamburg, Germany)

12:30-13:10 *Panel discussion*

13:10-14:20 *Lunch*

#### 14:20- 18:50 Session II – Exercise and dyspnoea

14:20-15:15 *The role afferent feedback from skeletal muscles, heart and lungs in the perception of effort in healthy adults*  
Samuele M. Marcora (Kent, UK)  
*Discussants:* Francois Maltais (Quebec, Canada) and Denis E. O'Donnell (Kingston, Canada)

15:15-16:10 *Dyspnoea during exercise in healthy adults and athletes*  
Lee M. Romer (Uxbridge, UK)  
*Discussant:* Louis Laviolette (Paris, France)

16:10-16:30 *Coffee break*



- 16:30-17:25 ***Dyspnoea during exercise in patients with cardiorespiratory disease***  
Denis E. O'Donnell (Kingston, Canada)  
*Discussant:* Pierantonio Laveneziana (Paris, France)
- 17:25-18:20 ***Interaction between muscle fatigue and dyspnoea in cardiorespiratory diseases***  
Francois Maltais (Quebec, Canada)  
*Discussants:* Lee Romer (Uxbridge, UK) and Samuele M. Marcora (Kent, UK)
- 18:20-18:50 ***Panel discussion***

**Day 2 – Friday, November 9, 2012**

**08:30-13:25 Session III – The clinical impact and management of dyspnoea**

- 08:30-09:25 ***Neural processing of dyspnoea relief***  
Claudine Peiffer (Paris, France)  
*Discussant:* Robert B. Banzett (Boston, USA) and Capucine Morelot-Panzini (Paris, France)
- 09:25-10:20 ***Dyspnea in chronic hyperventilation syndrome***  
Sandy Jack (Liverpool, UK)  
*Discussant:* Thomas Similowski (Paris, France)
- 10:20-10:40 ***Coffee break***
- 10:40-11:35 ***The clinical management of exertional dyspnoea in patients with cardiorespiratory diseases***  
Denis E. O'Donnell (Kingston, Canada)  
*Discussant:* Pierantonio Laveneziana (Paris, France)
- 11:35-12:30 ***Rehabilitation in cardiorespiratory diseases***  
Francois Maltais (Quebec, Canada)  
*Discussant:* Louis Laviolette (Paris, France)
- 12:30-13:25 ***Dyspnea in the ICU***  
Thomas Similowski (Paris, France)  
*Discussant:* Mark B. Parshall (Albuquerque, USA)
- 13:25-14:30 ***Lunch***
- 14:30-15:20 ***General discussion & establishing research priorities***
- 15:20-15:30 ***Closing remarks & salutations***
